# Supplementary material
Source: PubMed Central journal article supplement (PMC3247995)
Supplement: supp_M111.275073_jbc.M111.275073-2.pdf [file supp_M111.275073_jbc.M111.275073-2.pdf]

### Supplement Table 1: Mass spectroscopic identification of INrf2 and PGAM5 proteins peptides.

Control 293 cells and INrf2-293 cells were treated with tetracycline (0.5µg/ml) for 24h for induction of Flag-INrf2 protein in INrf2-293 cells. 10 mg cell lysates were immunoprecipitated with anti-Flag antibodies, the immune complexes were separated by SDS-PAGE and gels were stained with CBB (as shown in Fig. 2A). Gel slices containing bands indicated by arrows in figure 2A were reduced, alkylated, and digested with trypsin. Tryptic peptides were desalted and subjected to LC-MS/MS analysis. Some of INrf2 and PGAM5 proteins peptide identified by LC-MS/MS were presented below.

| INrf2<br>a.a. | INrf2 Peptide<br>Sequence | charge<br>State | XCorr | PGAM5<br>a.a. | PGAM5 Peptide<br>Sequence | Charge<br>State | XCorr |
|---------------|---------------------------|-----------------|-------|---------------|---------------------------|-----------------|-------|
| 51-61         | TFSYTLSDHTK               | 2               | 2.38  | 33-52         | AGGDAEPRPAEPP             |                 |       |
| 72-84         | LSQQLCDVTLQVK             | 2               | 3.93  | 41-52         | AWAGGAR                   | 2               | 2.95  |
| 98-108        | VVLASSSPVFK               | 2               | 3.64  | 41-52         | PAEPPAWAGGAR              | 2               | 2.98  |
| 117-131       | EQGMEVVSIEGIHPK           | 2               | 3.86  | 53-64         | PGPGVWDPNWDR              | 2               | 3.08  |
|               | CVLHVMNGAVMYQ             |                 |       | 65-74         | REPLSLINVR                | 2               | 3.41  |
| 151-169       | IDSVVR                    | 2               | 3.87  | 66-74         | EPLSLINVR                 | 1               | 1.63  |
|               |                           |                 |       |               | RNVESGEEELASKLDH          |                 |       |
| 203-216       | AREYIYMHFGEVAK            | 3               | 3.43  | 76-93         | YK                        | 3               | 4.87  |
| 205-216       | EYIYMHFGEVAK              | 2               | 3.81  | 77-88         | NVESGEEELASK              | 1               | 2.46  |
| 262-269       | FYVQALLR                  | 2               | 3.25  | 77-88         | NVESGEEELASK              | 2               | 4.15  |
|               |                           |                 |       |               | NVESGEEELASKLDHY          |                 |       |
| 288-296       | CEILQSDSR                 | 2               | 3.41  | 77-93         | K                         | 2               | 4.98  |
|               | YEPERDEWHLVAPM            |                 |       |               |                           |                 |       |
| 443-459       | LTR                       | 3               | 3.75  | 99-104        | HIFLIR                    | 1               | 1.70  |
| 460-470       | RIGVGVAVLNR               | 2               | 3.25  | 105-116       | HSQYHVDGSLEK              | 2               | 4.10  |
| 461-470       | IGVGVAVLNR                | 2               | 1.97  | 105-118       | HSQYHVDGSLEKDR            | 2               | 5.73  |
| 471-483       | LLYAVGGFDGTNR             | 2               | 4.35  | 119-125       | TLTPLGR                   | 1               | 1.66  |
| 484-494       | LNSAECYPER                | 2               | 3.32  | 126-134       | EQAELTGLR                 | 1               | 1.57  |
| 499-507       | MITAMNTIR                 | 2               | 2.82  | 135-141       | LASLGLK                   | 1               | 1.77  |
|               | SGAGVCVLHNCIYA            |                 |       |               |                           |                 |       |
|               | AGGYDGQDQLNSV             |                 |       |               |                           |                 |       |
| 508-536       | ER                        | 3               | 4.96  | 135-144       | LASLGLKFNK                | 2               | 2.78  |
| 602-614       | SGVGVAVTMEPCR             | 2               | 3.81  | 142-152       | FNKIVHSSMTR               | 2               | 3.22  |
| 602-615       | SGVGVAVTMEPCRK            | 2               | 3.26  | 153-162       | AIETTDIISR                | 2               | 4.02  |
|               | YEPERDEWHLVAPM            |                 |       |               |                           |                 |       |
| 443-459       | LTR                       | 3               | 3.75  | 204-209       | IEAAFR                    | 1               | 1.76  |
| 460-470       | RIGVGVAVLNR               | 2               | 3.25  | 241-251       | ALQFPPEGWLR               | 2               | 3.28  |

MS/MS spectra were searched against a UniProt human protein database using Sorcerer™-SEQUEST® (Sage-N Research). Database search parameters were as follows: enzyme – trypsin; cleavage – full; precursor mass tolerance – 1.5Da; fragment ion tolerance – 0.5 Da; missed cleavages – 2; modifications – Cys carbamidomethylation (+57.02), and Met oxidation (+15.99). The quality of protein assignments was assessed using ProteinProphet. Proteins with probabilities  $\geq 1.0$  and  $\geq 2$  unique peptides were accepted as confidently identified proteins. The quality of peptide assignments was assessed using the following Xcorr vs. charge state filter: 1+:  $\geq 1.5$ , 2+:  $\geq 2.5$ , 3+:  $\geq 3.0$ , and 4+:  $\geq 3.5$ .
